# Supplementary material
Source: publisher figshare collection journal article supplement (https://acs.figshare.com/ndownloader/files/4641721)
Supplement: Supplementary file 1 [file 4641721]

## Supporting information

### **Unveiling the role of histidine and tyrosine residues on the conformation of the avian prion hexarepeat domain**

*Adriana Pietropaolo<sup>1</sup>, Luca Muccioli<sup>1</sup>, Claudio Zannoni<sup>1\*</sup>, Diego La Mendola<sup>2</sup>, Giuseppe Maccarrone<sup>3</sup>, Giuseppe Pappalardo<sup>2</sup> and Enrico Rizzarelli<sup>3</sup>*

<sup>1</sup> Dipartimento di Chimica Fisica e Inorganica and INSTM, Università di Bologna, v.le Risorgimento 4, 40136 Bologna (Italy)

<sup>2</sup> CNR-Istituto di Biostrutture e Bioimmagini Catania, v.le A. Doria 6, 95125 Catania (Italy)

<sup>3</sup> Dipartimento di Scienze Chimiche, Università di Catania, v.le A. Doria 6, 95125 Catania (Italy)

\*corresponding author

[Claudio.Zannoni@unibo.it](mailto:Claudio.Zannoni@unibo.it)

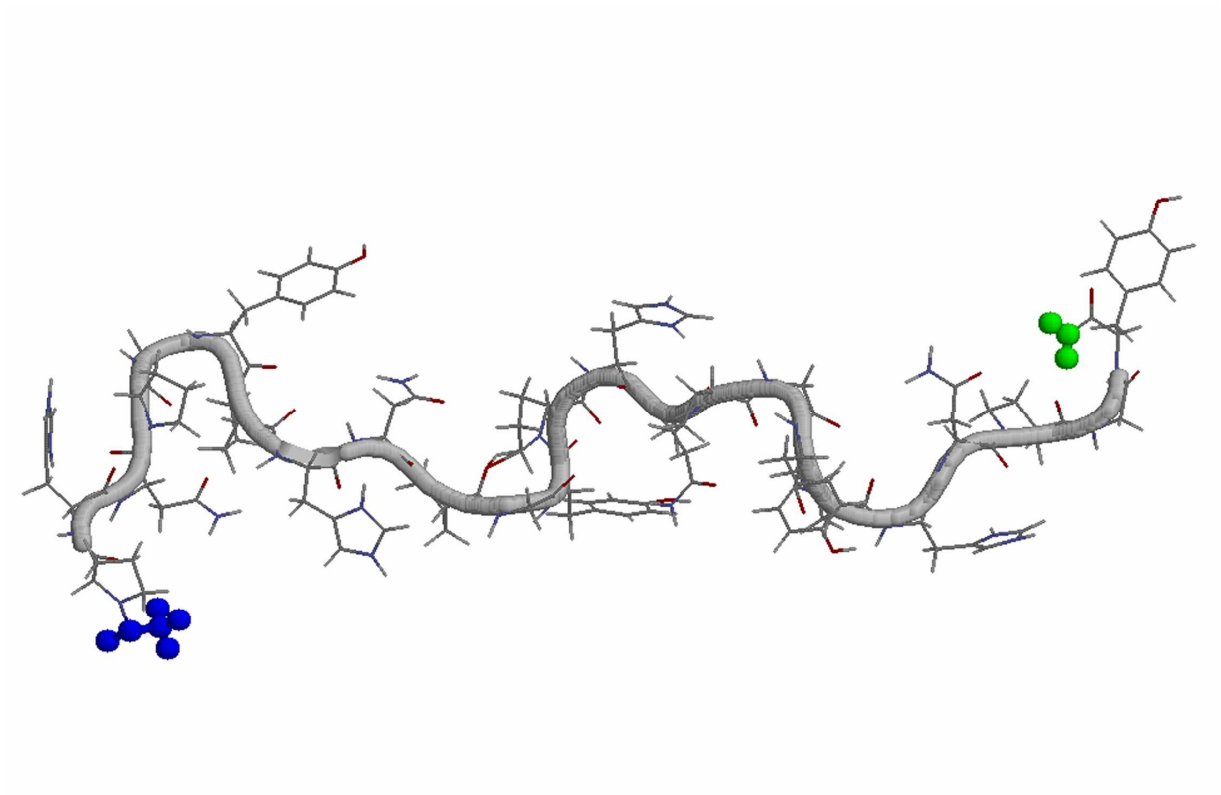

Figure 1: Starting configuration of TetraHexaPY, where the N-terminal Acetyl and the C-terminal amide are shown in blue and in green respectively.

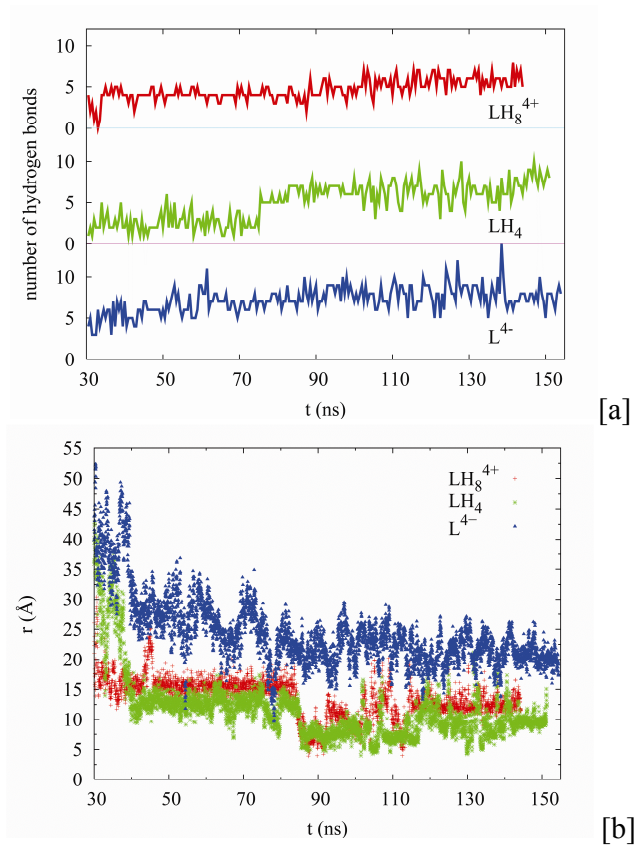

Figure 2: Time evolution of hydrogen bonds number [a] and of the end-to-end distance relative to the  $C_\alpha$  carbons [b]. Both of them are useful to check the equilibration of the starting configuration of the peptide, initially with an elongated structure and thus having few hydrogen bonds. This starting configuration is clearly lost during the run.

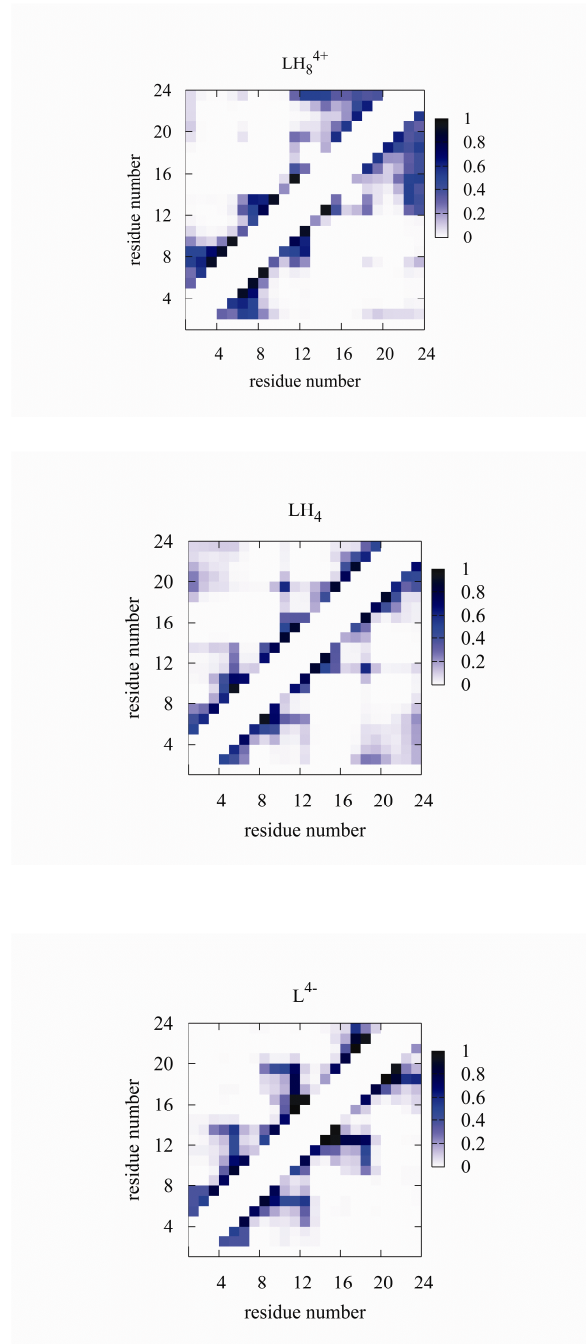

Figure 3: Contact maps of TetraHexaPY as a function of pH. It is worth to note a more compact structure at neutral pH ( $\text{LH}_4$ ), underlined from the N- and C-terminal contacts and that the  $\text{L}^{4-}$  state shows the most expanded structure. The relative occurrence of the contacts is shown with a color code ranging from white to black.

Table 1: Average  $G$  values and relative standard deviations,  $\sigma_G$ , of the ideal secondary structures, involving at least NR residues. Each structure was built by extracting  $\phi$  and  $\psi$  angles from a gaussian distribution, centered on the ideal  $\phi$  and  $\psi$  values, with a gaussian half-height amplitude of 15 degree (see reference [38] ).

| Structure      | $\langle G \rangle$ | $\sigma_G$ | Number of residues |
|----------------|---------------------|------------|--------------------|
| $\alpha$ helix | -.04                | 0.02       | >3                 |
| $3_{10}$ helix | -.07                | 0.01       | >3                 |
| $\beta$ Turn I | -.07                | 0.01       | 2,3                |
| $\beta$ Sheets | +.00                | 0.01       | $\geq 2$           |
| PPII           | +.10                | 0.03       | >3                 |
| $\pi$ helix    | -.01                | 0.02       | >3                 |
